# Supplementary material for: Understanding how cAMP-dependent protein kinase can catalyze phosphoryl transfer in the presence of Ca2+and Sr2+: a QM/MM study
Source: Royal Society of Chemistry journal article supplement (doi:10.1039/c7cp00666g), 2017-01-01
Supplement: c7cp00666g1.pdf [file c7cp00666g1.pdf]

## Supplementary information

**Table S1.** Selected QM(B3LYP/6-31+G(d))/CHARMM bond distances (Å), bond angles (deg), and dihedrals (deg) of the calcium-bound initial model structures. Selected QM(B3LYP/def2-TZVP)/CHARMM bond distances (Å), bond angles (deg), and dihedrals (deg) of the strontium-bound initial model structures. Comparison with values from pseudo-Michaelis complex 4IAC X-ray crystallographic structure (used as model template) and PKAc-Mg<sub>2</sub>ATP-SP20 initial model structure (QM(B3LYP/6-31+G(d))/CHARMM level). Ser<sub>substrate</sub> holds for Ser21 and Ser17 in SP20- and Kemptide-bound ternary complex models, respectively.

|                                                        | 4IAC   | <i>i</i> <sub>model</sub> S <sub>Mg</sub> | <i>i</i> <sub>model</sub> S <sub>Ca</sub> | <i>i</i> <sub>model</sub> S <sub>Sr</sub> | <i>i</i> <sub>model</sub> K <sub>Ca</sub> | <i>i</i> <sub>model</sub> K <sub>Sr</sub> |
|--------------------------------------------------------|--------|-------------------------------------------|-------------------------------------------|-------------------------------------------|-------------------------------------------|-------------------------------------------|
| O3βATP-PγATP                                           | 1.8*   | 1.70                                      | 1.72                                      | 1.70                                      | 1.74                                      | 1.70                                      |
| PγATP-OγSer <sub>substrate</sub>                       | 3.5    | 3.76                                      | 3.59                                      | 3.70                                      | 3.68                                      | 3.59                                      |
| OγSer <sub>substrate</sub> -HySer <sub>substrate</sub> | ---    | 0.98                                      | 0.99                                      | 0.99                                      | 1.00                                      | 0.99                                      |
| Oδ2Asp166-HySer <sub>substrate</sub>                   | ---    | 4.23                                      | 4.69                                      | 4.23                                      | 4.24                                      | 4.40                                      |
| O2γATP-HySer <sub>substrate</sub>                      | ---    | 3.52                                      | 3.47                                      | 3.23                                      | 3.31                                      | 3.39                                      |
| OγSer <sub>substrate</sub> -Oδ2Asp166                  | 4.4    | 4.28                                      | 4.93                                      | 4.24                                      | 4.30                                      | 4.60                                      |
| <i>a</i> ·O3βATP-PγATP-OγSerSubs.                      | 148.2* | 141.3                                     | 143.2                                     | 142.2                                     | 141.7                                     | 146.6                                     |
| <i>a</i> ·OγSerSubs.-HySerSubs.-Oδ2Asp166              | ---    | 86.4                                      | 98.0                                      | 83.8                                      | 86.6                                      | 95.3                                      |
| <i>a</i> ·Oδ2Asp166-HySerSubs.-O2γATP                  | ---    | 60.2                                      | 57.1                                      | 67.0                                      | 64.8                                      | 63.9                                      |
| <i>d</i> ·Ser21(N-Cα-Cβ-Oγ)                            | 64.0   | 68.7                                      | 61.2                                      | 68.7                                      | 70.8                                      | 69.1                                      |
| <i>d</i> ·Asp166(Cβ-Cγ-Oδ2)-O2γATP                     | 160.0  | 167.2                                     | -179.7                                    | -177.8                                    | 178.2                                     | -153.6                                    |
| M1-O1βATP                                              | 2.2    | 2.08                                      | 2.38                                      | 2.54                                      | 2.38                                      | 2.53                                      |
| M1-O3γATP                                              | 2.3    | 2.16                                      | 2.47                                      | 2.74                                      | 2.47                                      | 2.48                                      |

|                       |      |      |      |      |      |      |
|-----------------------|------|------|------|------|------|------|
| M1-O $\delta$ 1Asp184 | 2.4  | 2.21 | 2.47 | 2.63 | 2.49 | 2.56 |
| M1-O $\delta$ 2Asp184 | 2.3  | 2.20 | 2.58 | 2.77 | 2.53 | 2.68 |
| M1-OH2XWAT1003        | 2.2  | 2.07 | 2.44 | 2.64 | 2.43 | 2.60 |
| M1-OH2XWAT1001        | 2.2  | 2.02 | 2.43 | 2.63 | 2.45 | 2.52 |
| M1-OH2XWAT1029        | 4.0  | 3.94 | 2.51 | 2.66 | 2.42 | 2.52 |
| M1-OH2XWAT1057        | 6.1  | 4.97 | 4.55 | 2.59 | 4.20 | 2.62 |
| M2-O2 $\alpha$ ATP    | 2.2  | 1.99 | 2.32 | 2.41 | 2.32 | 2.40 |
| M2-O3 $\beta$ ATP     | 3.3* | 2.96 | 2.65 | 2.89 | 2.55 | 2.91 |
| M2-O2 $\gamma$ ATP    | 2.2  | 2.00 | 2.35 | 2.42 | 2.39 | 2.47 |
| M2-O $\delta$ 2Asp184 | 2.2  | 2.10 | 2.37 | 2.47 | 2.38 | 2.46 |
| M2-O $\delta$ 1Asn171 | 2.2  | 2.01 | 2.30 | 2.39 | 2.30 | 2.43 |
| M2-OH2XWAT1002        | 2.3  | 2.12 | 2.41 | 2.53 | 2.40 | 2.53 |

---

For 4IAC \* stands for O3 $\beta$ ATP = C $\beta$ AMPPCP.

**Table S2.** For the PKAc-Ca<sub>2</sub>ATP-SP20 model, selected QM(B3LYP/6-31+G(d))/CHARMM bond distances (Å), bond angles (deg), and dihedrals (deg) in the optimized reactants (Rd<sub>Ca/S</sub>), phosphoryl-transfer transition state (TSd1P<sub>Ca/S</sub>), proton shift intermediate (Id1<sub>Ca/S</sub>), proton shift transition state (TSd1H<sub>Ca/S</sub>), phosphoryl-transfer products (Pd1<sub>Ca/S</sub>), protonated Asp166 side chain-rotation transition state (TSd2T<sub>Ca/S</sub>), and proton-transfer products (Pd2<sub>Ca/S</sub>) for the dissociative mechanism with the O2γATP as the final proton acceptor (O2γATP-dissociative path). Comparison with values from X-ray crystallographic structures characterizing different stages of the phosphoryl-transfer mechanism catalyzed by the PKAc with SP20 or CP20 as substrates and Ca<sup>2+</sup> ions.

| <i>Active core geometric features</i>        | 4XW4   | 4XW5       | i <sub>model</sub> S <sub>Ca</sub> | Rd <sub>Ca/S</sub> | TSd1P <sub>Ca/S</sub> | Id1 <sub>Ca/S</sub> | TSd1H <sub>Ca/S</sub> | Pd1 <sub>Ca/S</sub> | TSd2T <sub>Ca/S</sub> | Pd2 <sub>Ca/S</sub> | 4IAI   | 4XW6         |
|----------------------------------------------|--------|------------|------------------------------------|--------------------|-----------------------|---------------------|-----------------------|---------------------|-----------------------|---------------------|--------|--------------|
| O3βATP-PyATP                                 | 1.74*  | 1.68       | 1.72                               | 1.77               | 2.40                  | 3.04                | 3.21                  | 3.37                | 3.35                  | 3.35                | 4.01   | 3.33         |
| PyATP-OγSer21                                | 4.70   | 5.55*      | 3.59                               | 3.47               | 2.45                  | 1.94                | 1.84                  | 1.73                | 1.69                  | 1.63                | 1.63   | 4.44/2.37*   |
| OγSer21-HγSer21                              | ---    | ---        | 0.99                               | 0.98               | 0.99                  | 1.04                | 1.20                  | 1.56                | 2.01                  | 2.62                | ---    | ---          |
| Oδ2Asp166-HγSer21                            | ---    | ---        | 4.69                               | 1.87               | 1.78                  | 1.57                | 1.25                  | 1.03                | 1.00                  | 1.53                | ---    | ---          |
| O2γATP-HγSer21                               | ---    | ---        | 3.47                               | 3.26               | 2.86                  | 2.74                | 2.78                  | 2.72                | 2.06                  | 1.03                | ---    | ---          |
| OγSer21-Oδ2Asp166                            | 4.55   | 3.36/3.17* | 4.93                               | 2.84               | 2.77                  | 2.60                | 2.44                  | 2.58                | 2.91                  | 3.55                | 5.01   | 5.80/3.06*   |
| angle <sub>O3βATP-PyATP-OγSer21</sub>        | 136.8* | 161.1      | 143.2                              | 155.4              | 164.6                 | 166.1               | 169.1                 | 175.4               | 173.6                 | 174.1               | 155.4  | 115.1/152.0* |
| angle <sub>OγSer21-HγSer21-Oδ2Asp166</sub>   | ---    | ---        | 98.0                               | 170.7              | 176.4                 | 172.0               | 171.0                 | 169.5               | 148.8                 | 114.7               | ---    | ---          |
| angle <sub>Oδ2Asp166-HγSer21-O2γATP</sub>    | ---    | ---        | 57.1                               | 103.0              | 107.1                 | 111.5               | 114.5                 | 112.1               | 129.7                 | 172.6               | ---    | ---          |
| d <sub>.Ser21(N-Cα-Cβ-Oγ)</sub>              | 64.3   | -76.6      | 61.2                               | -54.9              | -56.1                 | -46.1               | -46.1                 | -52.9               | -56.3                 | -55.7               | 63.9   | 56.9/-66.7*  |
| d <sub>.Asp166(Cβ-Cγ-Oδ2)-O2γATP</sub>       | 135.9  | 159.1      | -179.7                             | 144.2              | 130.5                 | 125.8               | 124.6                 | 120.3               | 137.8                 | 170.8               | ~130   | 129.5        |
| d <sub>.phiAsp166</sub>                      | -147.2 | -142.3     | -92.6                              | -95.4              | -90.7                 | -88.1               | -87.2                 | -94.9               | -96.1                 | -95.7               | -150.9 | -144.9       |
| d <sub>.psiAsp166</sub>                      | 40.5   | 34.4       | 88.0                               | 85.6               | 82.5                  | 80.4                | 79.2                  | 77.3                | 78.8                  | 83.9                | 43.0   | 36.7         |
| d <sub>.OγSer21-PyATP-O2γATP-Oδ2Asp166</sub> | -36.6  | -32.2      | -37.4                              | -40.8              | -39.2                 | -37.9               | -37.5                 | -35.3               | -39.3                 | -51.0               | 25.3*  | -3.2/-29.2*  |
| Oδ1Asp24 <sup>SP20</sup> -Cε1His87           | 6.00   | 5.04       | 5.7                                | 5.4                | 5.4                   | 5.4                 | 5.4                   | 5.4                 | 5.4                   | 5.4                 | 5.56   | 12.33        |
| Oδ1Asp24 <sup>SP20</sup> -Nε2Gly84           | 3.67   | 3.39       | 3.0                                | 2.9                | 2.9                   | 2.9                 | 2.9                   | 2.9                 | 2.9                   | 2.9                 | 5.26   | 11.36        |
| Oε1Gly84-Nδ1His87                            | 2.74   | 3.20       | 2.7                                | 2.70               | 2.70                  | 2.70                | 2.70                  | 2.70                | 2.70                  | 2.70                | 2.72   | 2.86         |
| O2pThr197-Nε2His87                           | 2.67   | 2.59       | 2.7                                | 2.65               | 2.65                  | 2.65                | 2.65                  | 2.65                | 2.65                  | 2.65                | 2.72   | 2.63         |

|                                             |                      |                      |                                 |                     |                       |                     |                       |                     |                       |                     |                |                                                                                      |
|---------------------------------------------|----------------------|----------------------|---------------------------------|---------------------|-----------------------|---------------------|-----------------------|---------------------|-----------------------|---------------------|----------------|--------------------------------------------------------------------------------------|
| OγSer21-OγATP                               | 5.54 <sup>*i=2</sup> | 5.62 <sup>*i=2</sup> | 4.3 <sup>i=2</sup>              | 3.20 <sup>i=2</sup> | 2.73 <sup>i=2</sup>   | 2.57 <sup>=2</sup>  | 2.53 <sup>=2</sup>    | 2.54 <sup>i=2</sup> | 2.49 <sup>i=2</sup>   | 2.50 <sup>i=2</sup> | 2.66           | 5.84 <sup>i=2</sup> /3.36 <sup>i=2</sup><br>4.22 <sup>i=3</sup> /3.01 <sup>i=3</sup> |
|                                             | 3.97 <sup>*i=3</sup> | 4.80 <sup>*i=3</sup> | 2.6 <sup>i=3</sup>              | 3.30 <sup>i=3</sup> | 2.83 <sup>i=3</sup>   | 2.64 <sup>i=3</sup> | 2.60 <sup>i=3</sup>   | 2.58 <sup>i=3</sup> | 2.58 <sup>i=3</sup>   | 2.58 <sup>i=3</sup> | 2.55           |                                                                                      |
|                                             |                      |                      |                                 |                     |                       |                     |                       |                     |                       |                     | 2.57           |                                                                                      |
| <i>Catalytic core interaction distances</i> | 4XW4                 | 4XW5                 | $i_{\text{model}}S_{\text{Ca}}$ | Rd <sub>Ca/S</sub>  | TSd1P <sub>Ca/S</sub> | Id1 <sub>Ca/S</sub> | TSd1H <sub>Ca/S</sub> | Pd1 <sub>Ca/S</sub> | TSd2T <sub>Ca/S</sub> | Pd2 <sub>Ca/S</sub> | 4IAI           | 4XW6                                                                                 |
| Oγ1Thr201-Oδ1Asp166                         | 2.98                 | 3.47                 | 2.76                            | 2.80                | 2.74                  | 2.73                | 2.75                  | 2.89                | 2.99                  | 2.94                | 2.88           | 3.04                                                                                 |
| Oγ1Thr201-NζLys168                          | 2.78                 | 2.79                 | 2.75                            | 2.74                | 2.71                  | 2.72                | 2.73                  | 2.75                | 2.75                  | 2.73                | 2.84           | 2.66                                                                                 |
| Oγ1Thr201-OγSer21                           | 5.54                 | 3.39                 | 5.21                            | 2.96                | 3.06                  | 3.04                | 3.08                  | 3.02                | 3.07                  | 3.05                | 5.55           | 5.99/3.51*                                                                           |
| Oδ2Asp166-OγSer21                           | 4.55                 | 3.36/3.17*           | 4.93                            | 2.84                | 2.77                  | 2.60                | 2.44                  | 2.58                | 2.91                  | 3.55                | 5.01           | 5.80/3.06*                                                                           |
| Oδ2Asp166-PyATP                             | 6.18                 | 6.02                 | 4.94                            | 4.70                | 4.11                  | 3.69                | 3.48                  | 3.43                | 3.40                  | 3.59                | 5.09           | 3.27                                                                                 |
| Oδ2Asp166-OH2XWAT1003                       | OH589<br>2.74        | OH595<br>2.63        | 2.70                            | 2.71                | 2.74                  | 2.79                | 2.86                  | 2.92                | 2.90                  | 2.78                | OH1001<br>2.65 | OH714<br>2.88                                                                        |
|                                             |                      | OH598<br>3.02        |                                 |                     |                       |                     |                       |                     |                       |                     | OH1003<br>2.79 |                                                                                      |
|                                             |                      |                      |                                 |                     |                       |                     |                       |                     |                       |                     |                |                                                                                      |
| Oδ2Asp166-NζLys168                          | 4.35                 | 4.36                 | 3.98                            | 4.31                | 4.45                  | 4.60                | 4.62                  | 5.05                | 4.95                  | 4.88                | 4.41           | 3.98                                                                                 |
| Oδ1Asp166-NζLys168                          | 4.06                 | 3.86                 | 4.32                            | 4.41                | 4.42                  | 4.43                | 4.39                  | 4.63                | 4.67                  | 4.62                | 4.15           | 3.77                                                                                 |
| NζLys168-OγSer21                            | 5.16                 | 3.26                 | 5.15                            | 2.86                | 3.05                  | 3.27                | 3.31                  | 3.37                | 3.37                  | 3.35                | 5.36           | 5.94/3.22*                                                                           |
| NζLys168-PyATP                              | 5.84                 | 5.97                 | 3.95                            | 3.88                | 3.64                  | 3.51                | 3.46                  | 3.31                | 3.31                  | 3.34                | 5.33           | 3.06                                                                                 |
| NζLys168-O2γATP                             | 5.23                 | 5.22                 | 2.71                            | 2.71                | 2.72                  | 2.69                | 2.69                  | 3.11                | 3.15                  | 3.08                | 5.03           | 2.98                                                                                 |
| NζLys168-O1γATP                             | 5.77                 | 6.14                 | 4.26                            | 4.18                | 3.84                  | 3.72                | 3.63                  | 2.81                | 2.77                  | 2.80                | 4.76           | 3.10                                                                                 |
| Nδ2Asn171-O2γATP                            | 6.08                 | 5.97                 | 4.85                            | 4.64                | 4.26                  | 4.10                | 3.92                  | 3.31                | 3.38                  | 3.70                | 5.57           | 3.19                                                                                 |
| Nδ2Asn171-Oδ2Asp166                         | 2.99                 | 2.85                 | 3.01                            | 3.58                | 3.84                  | 4.06                | 4.11                  | 4.23                | 3.66                  | 3.11                | 3.00           | 4.81                                                                                 |
| NζLys72-O1αATP                              | 3.02                 | 2.75                 | 2.75                            | 2.72                | 2.71                  | 2.72                | 2.72                  | 2.73                | 2.73                  | 2.73                | 3.84           | 3.17                                                                                 |
| NζLys72-O1βATP                              | 3.37                 | 2.91                 | 2.78                            | 2.78                | 2.75                  | 2.73                | 2.73                  | 2.73                | 2.73                  | 2.74                | 2.82           | 2.87                                                                                 |
| NζLys72-Oε2Glu91                            | 2.86                 | 2.67                 | 2.72                            | 2.72                | 2.75                  | 2.75                | 2.75                  | 2.75                | 2.75                  | 2.74                | 2.71           | 2.73                                                                                 |

|                                                 |                        |               |                                 |                    |                       |                     |                       |                     |                       |                     |                |               |
|-------------------------------------------------|------------------------|---------------|---------------------------------|--------------------|-----------------------|---------------------|-----------------------|---------------------|-----------------------|---------------------|----------------|---------------|
| OySer53-O1γATP                                  | 6.01                   | 2.57          | 5.63                            | 5.64               | 5.63                  | 5.67                | 5.78                  | 6.55                | 6.62                  | 6.72                | 2.39           | 2.97          |
| NSer53-O2βATP                                   | 4.54                   | 4.34          | 4.24                            | 4.47               | 4.17                  | 4.48                | 4.46                  | 4.45                | 4.47                  | 4.49                | 4.13           | 3.26          |
| NPhe54-O2βATP                                   | 5.45                   | 4.94          | 5.38                            | 5.85               | 5.39                  | 5.79                | 5.77                  | 5.77                | 5.79                  | 5.83                | 4.58           | 3.49          |
| NGly55-O2βATP                                   | 5.59                   | 5.09          | 5.57                            | 5.83               | 5.96                  | 5.68                | 5.66                  | 5.68                | 5.71                  | 5.77                | 3.53           | 5.11          |
| OySer53-OSer21                                  | 6.45                   | 7.25          | 4.8                             | 4.70               | 4.64                  | 4.70                | 4.72                  | 4.67                | 4.61                  | 4.53                | 4.46           | 4.80          |
| <i>Ca<sup>2+</sup> ions coordination sphere</i> | 4XW4                   | 4XW5          | $i_{\text{model}}S_{\text{Ca}}$ | $Rd_{\text{Ca/S}}$ | $TSd1P_{\text{Ca/S}}$ | $Id1_{\text{Ca/S}}$ | $TSd1H_{\text{Ca/S}}$ | $Pd1_{\text{Ca/S}}$ | $TSd2T_{\text{Ca/S}}$ | $Pd2_{\text{Ca/S}}$ | 4 A            | 4XW6          |
| Ca1-O1βATP                                      | 2.42                   | 2.26          | 2.38                            | 2.41               | 2.38                  | 2.36                | 2.35                  | 2.36                | 2.36                  | 2.36                | 2.26           | 2.37          |
| Ca1-O3γATP                                      | 2.63                   | 2.37          | 2.47                            | 2.40               | 2.41                  | 2.41                | 2.40                  | 2.44                | 2.46                  | 2.53                | 2.29*          | 2.13          |
| Ca1-Oδ1Asp184                                   | 2.59                   | 2.37          | 2.47                            | 2.47               | 2.46                  | 2.47                | 2.46                  | 2.52                | 2.54                  | 2.52                | 2.41           | 2.73          |
| Ca1-Oδ2Asp184                                   | 2.54                   | 2.42          | 2.58                            | 2.60               | 2.61                  | 2.59                | 2.59                  | 2.53                | 2.53                  | 2.55                | 2.45           | 2.25          |
| Ca1-OH2XWAT1003                                 | OH589<br>2.42          | OH598<br>2.69 | 2.44                            | 2.46               | 2.48                  | 2.50                | 2.53                  | 2.54                | 2.53                  | 2.48                | OH1003<br>2.41 | OH714<br>2.19 |
| Ca1-OH2XWAT1001                                 | OH592<br>2.42<br>OH711 | OH802<br>2.39 | 2.43                            | 2.44               | 2.45                  | 2.47                | 2.48                  | 2.48                | 2.47                  | 2.43                | OH702<br>2.43  | OH713<br>2.34 |
| Ca1-OH2XWAT1029                                 | 2.61<br>OH813<br>2.69  | OH594<br>2.64 | 2.51                            | 2.53               | 2.50                  | 2.50                | 2.50                  | 2.51                | 2.52                  | 2.51                | OH1004<br>2.47 |               |
| Ca2-O2αATP                                      | 2.34                   | 2.32          | 2.32                            | 2.31               | 2.31                  | 2.33                | 2.34                  | 2.36                | 2.37                  | 2.36                | 2.27           | 1.92          |
| Ca2-O3βATP                                      | 4.21*                  | 4.23          | 2.65                            | 2.52               | 2.40                  | 2.32                | 2.31                  | 2.31                | 2.30                  | 2.30                | 2.25           | 2.07          |
| Ca2-O2γATP                                      | 2.68<br>O3γATP<br>2.78 | 2.42          | 2.35                            | 2.33               | 2.34                  | 2.38                | 2.39                  | 2.45                | 2.49                  | 2.63                | OH701<br>2.57  | 2.47          |
| Ca2-Oδ2Asp184                                   | 2.29                   | 2.40          | 2.37                            | 2.40               | 2.41                  | 2.42                | 2.43                  | 2.40                | 2.39                  | 2.38                | 2.39           | 2.29          |
| Ca2-Oδ1Asn171                                   | 2.40                   | 2.38          | 2.30                            | 2.29               | 2.32                  | 2.35                | 2.36                  | 2.34                | 2.35                  | 2.35                | 2.43           | 2.20          |
| Ca2-OH2XWAT1002                                 | OH587<br>2.46          | OH596<br>2.57 | 2.41                            | 2.42               | 2.44                  | 2.46                | 2.46                  | 2.47                | 2.47                  | 2.45                | OH1002<br>2.42 | 2.35          |

OH590    OH595  
2.66    2.63

OH1001  
2.46

For 4IAI \* means that is not possible to establish the chemical correspondence of the O $\gamma$ ATP atoms in relation to the 4IAC nomenclature

**Table S3.** For the PKAc-Sr<sub>2</sub>ATP-SP20 model, selected QM(B3LYP/def2-TZVP)/CHARMM bond distances (Å), bond angles (deg), and dihedrals (deg) in the optimized reactants (Rd<sub>Sr/S</sub>), phosphoryl-transfer transition state (TSd1P<sub>Sr/S</sub>), phosphoryl-transfer products (Pd1<sub>Sr/S</sub>), protonated Asp166 side chain-rotation transition state (TSd2T<sub>Sr/S</sub>), and proton-transfer products (Pd2<sub>Sr/S</sub>) for the dissociative mechanism with the O2 $\gamma$ ATP as the final proton acceptor (O2 $\gamma$ ATP-dissociative path). Comparison with values from X-ray crystallographic structures characterizing the product complex stage of the phosphoryl-transfer mechanism catalyzed by the PKAc with SP20 as substrate and with Sr<sup>2+</sup> ions.

| <i>Active core geometric features</i>                                                                               | <i>i<sub>model</sub>S<sub>Sr</sub></i> | <i>Rd<sub>Sr/S</sub></i> | <i>TSd1P<sub>Sr/S</sub></i> | <i>Pd1<sub>Sr/S</sub></i> | <i>TSd2T<sub>Sr/S</sub></i> | <i>Pd2<sub>Sr/S</sub></i> | <i>4IAK</i> | <i>4IAY</i> |
|---------------------------------------------------------------------------------------------------------------------|----------------------------------------|--------------------------|-----------------------------|---------------------------|-----------------------------|---------------------------|-------------|-------------|
| O3 $\beta$ ATP-P $\gamma$ ATP                                                                                       | 1.70                                   | 1.77                     | 2.60                        | 4.05                      | 4.21                        | 4.34                      | 4.72        | 4.49        |
| P $\gamma$ ATP-O $\gamma$ Ser21                                                                                     | 3.70                                   | 3.59                     | 2.73                        | 1.72                      | 1.67                        | 1.61                      | 1.62        | 1.63        |
| O $\gamma$ Ser21-H $\gamma$ Ser21                                                                                   | 0.99                                   | 0.98                     | 0.99                        | 1.67                      | 2.03                        | 2.64                      | ---         | ---         |
| O $\delta$ 2Asp166-H $\gamma$ Ser21                                                                                 | 4.23                                   | 1.77                     | 1.72                        | 1.01                      | 0.99                        | 1.41                      | ---         | ---         |
| O2 $\gamma$ ATP-H $\gamma$ Ser21                                                                                    | 3.23                                   | 3.27                     | 2.98                        | 2.89                      | 2.11                        | 1.05                      | ---         | ---         |
| O $\gamma$ Ser21-O $\delta$ 2Asp166                                                                                 | 4.24                                   | 2.74                     | 2.71                        | 2.66                      | 2.93                        | 3.47                      | 5.21        | 5.09        |
| angle <sub>O3<math>\beta</math>ATP-P<math>\gamma</math>ATP-O<math>\gamma</math>Ser21</sub>                          | 142.2                                  | 154.1                    | 158.5                       | 161.5                     | 164.3                       | 152.9                     | 159.0       | 159.2       |
| angle <sub>O<math>\gamma</math>Ser21-H<math>\gamma</math>Ser21-O<math>\delta</math>2Asp166</sub>                    | 83.8                                   | 170.2                    | 178.4                       | 166.6                     | 149.7                       | 114.5                     | ---         | ---         |
| angle <sub>O<math>\delta</math>2Asp166-H<math>\gamma</math>Ser21-O2<math>\gamma</math>ATP</sub>                     | 67.0                                   | 105.7                    | 110.2                       | 124.6                     | 131.4                       | 174.3                     | ---         | ---         |
| d <sub>Ser21(N-C<math>\alpha</math>-C<math>\beta</math>-O<math>\gamma</math>)</sub>                                 | 68.7                                   | -53.3                    | -42.2                       | -39.4                     | -49.9                       | -51.3                     | 72.1        | 72.1        |
| d <sub>Asp166(C<math>\beta</math>-C<math>\gamma</math>-O<math>\delta</math>2)-O2<math>\gamma</math>ATP</sub>        | -177.8                                 | 160.5                    | 140.0                       | 130.8                     | 133.9                       | 155.9                     | -163.1      | -132.5      |
| d <sub>phiAsp166</sub>                                                                                              | -121.6                                 | -119.6                   | -119.7                      | -119.5                    | -125.8                      | -128.1                    | -151.4      | -142.8      |
| d <sub>psiAsp166</sub>                                                                                              | 75.6                                   | 80.5                     | 76.6                        | 70.4                      | 65.4                        | 66.1                      | 45.2        | 41.2        |
| d <sub>O<math>\gamma</math>Ser21-P<math>\gamma</math>ATP-O2<math>\gamma</math>ATP-O<math>\delta</math>2Asp166</sub> | -27.8                                  | -39.3                    | -36.5                       | -42.6                     | -39.2                       | -56.3                     | -85.7       | 31.4        |
| O $\delta$ 1Asp24 <sup>SP20</sup> -C $\epsilon$ 1His87                                                              | 5.5                                    | 5.5                      | 5.5                         | 5.5                       | 5.5                         | 5.5                       | 10.23       | 10.99       |

|                                             |                                 |                     |                       |                     |                       |                     |                      |                      |
|---------------------------------------------|---------------------------------|---------------------|-----------------------|---------------------|-----------------------|---------------------|----------------------|----------------------|
| Oδ1Asp24 <sup>SP20</sup> -Nε2Gly84          | 3.0                             | 2.9                 | 2.9                   | 3.0                 | 2.9                   | 2.9                 | 7.14                 | 9.32                 |
| Oε1Gly84-Nδ1His87                           | 2.8                             | 2.8                 | 2.8                   | 2.8                 | 2.8                   | 2.8                 | 2.76                 | 2.78                 |
| O2pThr197-Nε2His87                          | 2.7                             | 2.6                 | 2.6                   | 2.6                 | 2.6                   | 2.6                 | 2.69                 | 2.84                 |
| OγSer21-OγATP                               | 4.1 <sup>i=2</sup>              | 3.15 <sup>i=2</sup> | 2.83 <sup>i=2</sup>   | 2.46 <sup>i=2</sup> | 2.46 <sup>i=2</sup>   | 2.47 <sup>i=2</sup> | 2.58 <sup>*i=1</sup> | 2.57 <sup>*i=1</sup> |
|                                             | 2.7 <sup>i=3</sup>              | 3.49 <sup>i=3</sup> | 3.01 <sup>i=3</sup>   | 2.59 <sup>i=3</sup> | 2.54 <sup>i=3</sup>   | 2.54 <sup>i=3</sup> | 2.58 <sup>*i=2</sup> | 2.66 <sup>*i=2</sup> |
|                                             |                                 |                     |                       |                     |                       |                     | 2.71 <sup>*i=3</sup> | 2.66 <sup>*i=3</sup> |
| <i>Catalytic core interaction distances</i> | $i_{\text{model}}S_{\text{Sr}}$ | Rd <sub>Sr/S</sub>  | Tsd1P <sub>Sr/S</sub> | Pd1 <sub>Sr/S</sub> | Tsd2T <sub>Sr/S</sub> | Pd2 <sub>Sr/S</sub> | 4IAK                 | 4IAY                 |
| Oγ1Thr201-Oδ1Asp166                         | 2.68                            | 2.79                | 2.73                  | 2.77                | 2.93                  | 2.93                | 2.93                 | 2.88                 |
| Oγ1Thr201-NζLys168                          | 2.74                            | 2.80                | 2.74                  | 2.79                | 2.79                  | 2.77                | 2.74                 | 2.84                 |
| Oγ1Thr201-OγSer21                           | 4.86                            | 2.96                | 3.18                  | 3.31                | 3.28                  | 3.28                | 5.41                 | 5.55                 |
| Oδ2Asp166-OγSer21                           | 4.24                            | 2.74                | 2.71                  | 2.66                | 2.93                  | 3.47                | 5.09                 | 5.01                 |
| Oδ2Asp166-PγATP                             | 5.17                            | 4.87                | 4.33                  | 3.53                | 3.43                  | 3.42                | 5.19                 | 5.09                 |
| Oδ2Asp166-OH2XWAT1003                       | 2.72                            | 2.70                | 2.74                  | 3.04                | 2.94                  | 2.74                | OH1002               | OH1001               |
|                                             |                                 |                     |                       |                     |                       |                     | 2.80                 | 2.65                 |
|                                             |                                 |                     |                       |                     |                       |                     | OH1003               | OH1003               |
|                                             |                                 |                     |                       |                     |                       |                     | 2.67                 | 2.79                 |
| Oδ2Asp166-NζLys168                          | 3.99                            | 4.18                | 4.30                  | 4.53                | 4.81                  | 4.82                | 4.06                 | 4.41                 |
| Oδ1Asp166-NζLys168                          | 4.38                            | 4.27                | 4.17                  | 4.06                | 4.32                  | 4.36                | 4.04                 | 4.15                 |
| NζLys168-OγSer21                            | 4.90                            | 2.80                | 2.96                  | 3.21                | 3.25                  | 3.22                | 5.28                 | 5.36                 |
| NζLys168-PγATP                              | 3.99                            | 3.99                | 3.76                  | 3.51                | 3.35                  | 3.40                | 5.21                 | 5.33                 |
| NζLys168-O2γATP                             | 2.72                            | 2.79                | 2.81                  | 2.70                | 3.17                  | 3.15                | 4.89*                | 5.03*                |
| NζLys168-O1γATP                             | 4.28                            | 4.22                | 4.01                  | 3.86                | 2.92                  | 2.98                | 4.56*                | 4.76*                |
| Nδ2Asn171-O2γATP                            | 5.08                            | 4.88                | 4.54                  | 4.20                | 3.51                  | 3.52                | 5.79*                | 5.57*                |
| Nδ2Asn171-Oδ2Asp166                         | 2.95                            | 3.26                | 3.66                  | 4.11                | 3.83                  | 3.39                | 3.13                 | 3.00                 |

|                                                 |                                        |                          |                             |                           |                             |                           |                |                |
|-------------------------------------------------|----------------------------------------|--------------------------|-----------------------------|---------------------------|-----------------------------|---------------------------|----------------|----------------|
| NζLys72-O1αATP                                  | 2.73                                   | 2.73                     | 2.72                        | 2.71                      | 2.70                        | 2.70                      | 2.77           | 3.84           |
| NζLys72-O1βATP                                  | 2.83                                   | 2.81                     | 2.72                        | 3.23                      | 3.45                        | 3.62                      | 2.85           | 2.82           |
|                                                 | XW1029                                 | XW1029                   | XW1029                      | XW1029                    | XW1029                      | XW1029                    | XW1003         |                |
| NζLys72-Oε2Glu91                                | 2.83                                   | 2.83                     | 2.92                        | 2.81                      | 2.80                        | 2.79                      | 2.97           |                |
| OγSer53-O1γATP                                  | 2.71                                   | 2.73                     | 2.75                        | 2.72                      | 2.70                        | 2.69                      | 2.94           | 2.71           |
| NSer53-O2βATP                                   | 5.44                                   | 5.39                     | 5.21                        | 5.18                      | 6.05                        | 6.20                      | 2.34           | 2.39           |
| NPhe54-O2βATP                                   | 4.21                                   | 4.14                     | 4.16                        | 4.27                      | 4.15                        | 4.09                      | 3.75           | 4.13           |
| NPhe54-O2βATP                                   | 5.33                                   | 5.40                     | 5.39                        | 5.43                      | 5.43                        | 5.41                      | 4.85           | 4.58           |
| NGly55-O2βATP                                   | 5.74                                   | 5.84                     | 5.82                        | 5.82                      | 5.88                        | 5.89                      | 5.67           | 3.53           |
| OγSer53-OSer21                                  | 4.55                                   | 4.66                     | 4.63                        | 4.64                      | 4.52                        | 4.45                      | 5.32           | 4.46           |
| <i>Sr<sup>2+</sup> ions coordination sphere</i> | <i>i<sub>model</sub>S<sub>Sr</sub></i> | <i>Rd<sub>Sr/S</sub></i> | <i>TSd1P<sub>Sr/S</sub></i> | <i>Pd1<sub>Sr/S</sub></i> | <i>TSd2T<sub>Sr/S</sub></i> | <i>Pd2<sub>Sr/S</sub></i> | <i>4IAK</i>    | <i>4IAY</i>    |
| Sr1-O1βATP                                      | 2.54                                   | 2.53                     | 2.50                        | 2.54                      | 2.50                        | 2.52                      | 2.33           | 2.27           |
| Sr1-O3γATP                                      | 2.74                                   | 2.57                     | 2.63                        | 2.49                      | 2.59                        | 2.62                      | 2.44*          | 2.44*          |
| Sr1-Oδ1Asp184                                   | 2.63                                   | 2.64                     | 2.59                        | 2.60                      | 2.66                        | 2.61                      | 2.64           | 2.61           |
| Sr1-Oδ2Asp184                                   | 2.77                                   | 2.79                     | 2.79                        | 2.78                      | 2.72                        | 2.73                      | 2.64           | 2.55           |
| Sr1-OH2XWAT1003                                 | 2.64                                   | 2.68                     | 2.70                        | 2.88                      | 2.93                        | 2.84                      | OH1001<br>2.52 | OH1002<br>2.88 |
| Sr1-OH2XWAT1001                                 | 2.63                                   | 2.56                     | 2.57                        | 2.62                      | 2.61                        | 2.58                      | OH1003<br>2.49 | OH1006<br>2.86 |
| Sr1-OH2XWAT1029                                 | 2.66                                   | 2.68                     | 2.62                        | 2.64                      | 2.68                        | 2.67                      | OH701<br>2.49  | OH701<br>2.79  |
| Sr1-OH2XWAT1057                                 | 2.59                                   | 2.69                     | 2.68                        | 2.65                      | 2.66                        | 2.68                      | OH702<br>2.56  | OH1001<br>2.87 |
| Sr2-O2αATP                                      | 2.41                                   | 2.42                     | 2.40                        | 2.47                      | 2.48                        | 2.46                      | 2.35           | 2.37           |
| Sr2-O3βATP                                      | 2.89                                   | 2.83                     | 2.57                        | 2.56                      | 2.60                        | 2.61                      | 2.59           | 2.42           |
| Sr2-O2γATP                                      | 2.42                                   | 2.39                     | 2.46                        | 2.51                      | 2.63                        | 2.87                      | 3.90*          | 3.82*          |



|                 |                                        |                                        |                                        |                                        |                                        |                |                |                |
|-----------------|----------------------------------------|----------------------------------------|----------------------------------------|----------------------------------------|----------------------------------------|----------------|----------------|----------------|
| Sr2-Oδ2Asp184   | 2.47                                   | 2.49                                   | 2.52                                   | 2.63                                   | 2.61                                   | 2.59           | 2.46           | 2.50           |
| Sr2-Oδ1Asn171   | 2.39                                   | 2.40                                   | 2.46                                   | 2.55                                   | 2.52                                   | 2.54           | 2.62           | 2.70           |
| Sr2-OH2XWAT1002 | 2.53                                   | 2.52                                   | 2.53                                   | 2.56                                   | 2.59                                   | 2.56           | 2.61           | OH703<br>2.88  |
| Sr2-O1βATP      | 3.48                                   | 3.71                                   | 3.60                                   | 2.75                                   | 2.68                                   | 2.65           | 3.22           | 3.70           |
| Sr2-            | O1γATP<br>4.53 <sup>not directed</sup> | O1γATP<br>4.48 <sup>not directed</sup> | O1γATP<br>4.50 <sup>not directed</sup> | O1γATP<br>4.37 <sup>not directed</sup> | O1γATP<br>3.57 <sup>not directed</sup> | O1γATP<br>3.13 | OH703<br>2.66  | OH702<br>3.06  |
| Sr2-            |                                        |                                        |                                        |                                        |                                        |                | OH1004<br>2.47 | OH1003<br>2.77 |

For 4IAK and 4IAY \* means that is not possible to establish the chemical correspondence of the O1γATP atoms in relation to the 4IAC nomenclature

**Table S4.** For the PKAc-Ca<sub>2</sub>ATP-Kemptide model, selected QM(B3LYP/6-31+G(d))/CHARMM bond distances (Å), bond angles (deg), and dihedrals (deg) in the optimized reactants (Rd<sub>Ca/K</sub>), phosphoryl-transfer transition state (TSd1P<sub>Ca/K</sub>), proton shift intermediate (Id1<sub>Ca/K</sub>), proton shift transition state (TSd1H<sub>Ca/K</sub>), phosphoryl-transfer products (Pd1<sub>Ca/K</sub>), protonated Asp166 side chain-rotation transition state (TSd2T<sub>Ca/K</sub>), and proton-transfer products (Pd2<sub>Ca/K</sub>) for the dissociative mechanism with the O2γATP as the final proton acceptor (O2γATP-dissociative path).

| <i>Active core geometric features</i>      | <i>i<sub>model</sub>K<sub>Ca</sub></i> | <i>Rd<sub>Ca/K</sub></i> | <i>TSd1P<sub>Ca/K</sub></i> | <i>Id1<sub>Ca/K</sub></i> | <i>TSd1H<sub>Ca/K</sub></i> | <i>Pd1<sub>Ca/K</sub></i> | <i>TSd2T<sub>Ca/K</sub></i> | <i>Pd2<sub>Ca/K</sub></i> |
|--------------------------------------------|----------------------------------------|--------------------------|-----------------------------|---------------------------|-----------------------------|---------------------------|-----------------------------|---------------------------|
| O3βATP-PyATP                               | 1.74                                   | 1.79                     | 2.62                        | 3.26                      | 3.39                        | 3.56                      | 3.65                        | 3.66                      |
| PyATP-OγSer21                              | 3.68                                   | 3.69                     | 2.53                        | 1.97                      | 1.89                        | 1.76                      | 1.71                        | 1.65                      |
| OγSer21-HγSer21                            | 1.00                                   | 0.99                     | 1.00                        | 1.05                      | 1.18                        | 1.70                      | 2.05                        | 2.50                      |
| Oδ2Asp166-HγSer21                          | 4.24                                   | 1.80                     | 1.74                        | 1.52                      | 1.28                        | 1.02                      | 1.00                        | 1.57                      |
| O2γATP- HγSer21                            | 3.31                                   | 3.27                     | 2.83                        | 2.68                      | 2.75                        | 2.92                      | 2.00                        | 1.03                      |
| OγSer21-Oδ2Asp166                          | 4.30                                   | 2.79                     | 2.74                        | 2.56                      | 2.46                        | 2.71                      | 2.91                        | 3.28                      |
| angle <sub>O3βATP-PyATP-OγSer21</sub>      | 141.7                                  | 148.7                    | 157.4                       | 161.2                     | 161.7                       | 161.2                     | 171.6                       | 170.2                     |
| angle <sub>OγSer21-HγSer21-Oδ2Asp166</sub> | 86.6                                   | 174.3                    | 173.5                       | 170.3                     | 171.1                       | 167.0                     | 142.1                       | 105.0                     |

|                                              |                    |                     |                     |                     |                     |                     |                     |                     |
|----------------------------------------------|--------------------|---------------------|---------------------|---------------------|---------------------|---------------------|---------------------|---------------------|
| angle <sub>Oδ2Asp166-HySer21-O2γATP</sub>    | 64.8               | 108.7               | 112.8               | 115.4               | 117.6               | 126.4               | 139.1               | 175.4               |
| d <sub>·Ser21(N-Cα-Cβ-Oγ)</sub>              | 70.8               | -48.1               | -33.1               | -33.8               | -34.7               | -33.7               | -36.2               | -36.5               |
| d <sub>·Asp166(Cβ-Cγ-Oδ2)-O2γATP</sub>       | 178.2              | 152.9               | 141.1               | 132.6               | 131.1               | 136.9               | 154.6               | 171.8               |
| d <sub>·phiAsp166</sub>                      | -128.1             | -124.7              | -122.9              | -120.7              | -119.4              | -120.1              | -123.4              | -121.8              |
| d <sub>·psiAsp166</sub>                      | 80.8               | 76.0                | 73.2                | 71.7                | 71.4                | 71.1                | 73.0                | 76.0                |
| d <sub>·OγSer21-PγATP-O2γATP-Oδ2Asp166</sub> | -31.1              | -41.7               | -40.2               | -38.7               | -38.1               | -43.2               | -43.0               | -50.3               |
| OγSer21-OγATP                                | 4.1 <sup>i=2</sup> | 3.18 <sup>i=2</sup> | 2.71 <sup>i=2</sup> | 2.52 <sup>i=2</sup> | 2.50 <sup>i=2</sup> | 2.45 <sup>i=2</sup> | 2.44 <sup>i=2</sup> | 2.46 <sup>i=2</sup> |
|                                              | 2.7 <sup>i=3</sup> | 3.65 <sup>i=3</sup> | 2.96 <sup>i=3</sup> | 2.70 <sup>i=3</sup> | 2.65 <sup>i=3</sup> | 2.60 <sup>i=3</sup> | 2.62 <sup>i=3</sup> | 2.63 <sup>i=3</sup> |

| <i>Catalytic core interaction distances</i> | <i>i<sub>model</sub>K<sub>Ca</sub></i> | <i>Rd<sub>Ca/K</sub></i> | <i>TSd1P<sub>Ca/K</sub></i> | <i>ld1<sub>Ca/K</sub></i> | <i>TSd1H<sub>Ca/K</sub></i> | <i>Pd1<sub>Ca/K</sub></i> | <i>TSd2T<sub>Ca/K</sub></i> | <i>Pd2<sub>Ca/K</sub></i> |
|---------------------------------------------|----------------------------------------|--------------------------|-----------------------------|---------------------------|-----------------------------|---------------------------|-----------------------------|---------------------------|
| Oγ1Thr201-Oδ1Asp166                         | 2.74                                   | 3.00                     | 2.84                        | 2.81                      | 2.81                        | 2.91                      | 3.17                        | 3.23                      |
| Oγ1Thr201-NζLys168                          | 2.82                                   | 2.88                     | 2.78                        | 2.81                      | 2.82                        | 2.84                      | 2.82                        | 2.79                      |
| Oγ1Thr201-OγSer21                           | 5.21                                   | 2.93                     | 3.24                        | 3.33                      | 3.35                        | 3.39                      | 3.27                        | 3.24                      |
| Oδ2Asp166-OγSer21                           | 4.30                                   | 2.79                     | 2.74                        | 2.56                      | 2.46                        | 2.71                      | 2.91                        | 3.28                      |
| Oδ2Asp166-PγATP                             | 5.05                                   | 4.80                     | 4.14                        | 3.68                      | 3.54                        | 3.60                      | 3.41                        | 3.48                      |
| Oδ2Asp166-OH2XWAT1003                       | 2.69                                   | 2.74                     | 2.78                        | 2.84                      | 2.88                        | 2.97                      | 2.95                        | 2.77                      |
| Oδ2Asp166-NζLys168                          | 3.96                                   | 4.37                     | 4.38                        | 4.44                      | 4.42                        | 4.56                      | 4.82                        | 4.87                      |
| Oδ1Asp166-NζLys168                          | 4.45                                   | 4.46                     | 4.36                        | 4.34                      | 4.30                        | 4.32                      | 4.53                        | 4.43                      |
| NζLys168-OγSer21                            | 5.00                                   | 2.74                     | 2.94                        | 3.13                      | 3.15                        | 3.11                      | 3.15                        | 3.17                      |
| NζLys168-PγATP                              | 4.11                                   | 4.16                     | 3.81                        | 3.61                      | 3.56                        | 3.52                      | 3.36                        | 3.41                      |
| NζLys168-O2γATP                             | 2.82                                   | 2.87                     | 2.83                        | 2.79                      | 2.77                        | 2.74                      | 3.16                        | 3.21                      |
| NζLys168-O1γATP                             | 4.52                                   | 4.62                     | 4.15                        | 2.87                      | 3.82                        | 3.87                      | 2.94                        | 2.93                      |
| Nδ2Asn171-O2γATP                            | 4.79                                   | 4.77                     | 4.34                        | 4.09                      | 4.03                        | 4.08                      | 3.47                        | 3.66                      |
| Nδ2Asn171-Oδ2Asp166                         | 3.01                                   | 3.26                     | 3.42                        | 3.62                      | 3.67                        | 3.64                      | 3.19                        | 2.98                      |

|                  |      |      |      |      |      |      |      |      |
|------------------|------|------|------|------|------|------|------|------|
| NζLys72-O1αATP   | 2.74 | 2.72 | 2.71 | 2.72 | 2.72 | 2.72 | 2.72 | 2.72 |
| NζLys72-O1βATP   | 2.76 | 2.76 | 2.73 | 2.74 | 2.74 | 2.75 | 2.76 | 2.76 |
| NζLys72-Oε2Glu91 | 2.70 | 2.69 | 2.71 | 2.72 | 2.72 | 2.73 | 2.73 | 2.72 |
| OγSer53-O1γATP   | 5.49 | 5.17 | 5.35 | 5.47 | 5.49 | 5.44 | 6.25 | 6.39 |
| NSer53-O2βATP    | 4.21 | 4.29 | 4.28 | 4.28 | 4.27 | 4.28 | 4.24 | 4.23 |
| NPhe54-O2βATP    | 5.46 | 5.46 | 5.47 | 5.45 | 5.44 | 5.44 | 5.44 | 5.47 |
| NGly55-O2βATP    | 5.77 | 5.70 | 5.70 | 5.65 | 5.64 | 5.62 | 5.64 | 5.70 |
| OγSer53-OSer21   | 4.75 | 4.96 | 4.94 | 4.97 | 4.98 | 4.95 | 5.07 | 5.05 |

| <i>Ca<sup>2+</sup> ions coordination sphere</i> | $i_{\text{model}}K_{\text{Ca}}$ | $Rd_{\text{Ca/K}}$ | $\text{TSd1P}_{\text{Ca/K}}$ | $\text{ld1}_{\text{Ca/K}}$ | $\text{TSd1H}_{\text{Ca/K}}$ | $\text{Pd1}_{\text{Ca/K}}$ | $\text{TSd2T}_{\text{Ca/K}}$ | $\text{Pd2}_{\text{Ca/K}}$ |
|-------------------------------------------------|---------------------------------|--------------------|------------------------------|----------------------------|------------------------------|----------------------------|------------------------------|----------------------------|
| Ca1-O1βATP                                      | 2.38                            | 2.37               | 2.33                         | 2.32                       | 2.32                         | 2.32                       | 2.32                         | 2.32                       |
| Ca1-O3γATP                                      | 2.47                            | 2.41               | 2.47                         | 2.47                       | 2.45                         | 2.43                       | 2.56                         | 2.66                       |
| Ca1-Oδ1Asp184                                   | 2.49                            | 2.45               | 2.44                         | 2.45                       | 2.46                         | 2.47                       | 2.55                         | 2.52                       |
| Ca1-Oδ2Asp184                                   | 2.53                            | 2.60               | 2.58                         | 2.58                       | 2.58                         | 2.61                       | 2.53                         | 2.54                       |
| Ca1-OH2XWAT1003                                 | 2.43                            | 2.45               | 2.47                         | 2.48                       | 2.50                         | 2.51                       | 2.49                         | 2.46                       |
| Ca1-OH2XWAT1001                                 | 2.45                            | 2.40               | 2.41                         | 2.42                       | 2.42                         | 2.41                       | 2.41                         | 2.40                       |
| Ca1-OH2XWAT1029                                 | 2.42                            | 2.63               | 2.57                         | 2.59                       | 2.59                         | 2.60                       | 2.61                         | 2.59                       |
| Ca2-O2αATP                                      | 2.32                            | 2.31               | 2.30                         | 2.31                       | 2.32                         | 2.34                       | 2.36                         | 2.35                       |
| Ca2-O3βATP                                      | 2.55                            | 2.57               | 2.39                         | 2.35                       | 2.34                         | 2.34                       | 2.35                         | 2.35                       |
| Ca2-O2γATP                                      | 2.39                            | 2.36               | 2.38                         | 2.39                       | 2.38                         | 2.37                       | 2.41                         | 2.55                       |
| Ca2-Oδ2Asp184                                   | 2.38                            | 2.42               | 2.44                         | 2.46                       | 2.46                         | 2.48                       | 2.43                         | 2.40                       |
| Ca2-Oδ1Asn171                                   | 2.30                            | 2.31               | 2.34                         | 2.36                       | 2.37                         | 2.39                       | 2.36                         | 2.36                       |
| Ca2-OH2XWAT1002                                 | 2.40                            | 2.40               | 2.41                         | 2.42                       | 2.43                         | 2.43                       | 2.42                         | 2.40                       |

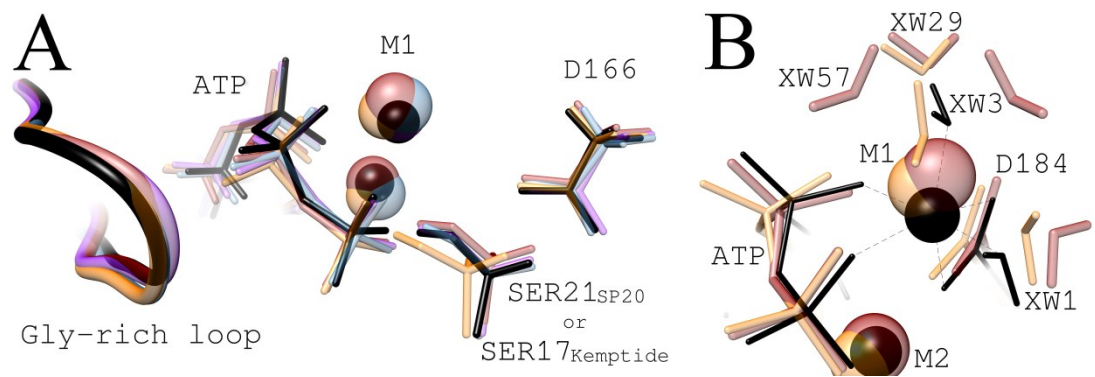

**Figure S1. (A)** Superposition of the active sites in the initial model structures of PKAc-Ca<sub>2</sub>ATP-SP20 ( $i_{\text{model}}^{\text{S}_{\text{Ca}}}$ , colored in orange), PKAc-Sr<sub>2</sub>ATP-SP20 ( $i_{\text{model}}^{\text{S}_{\text{Sr}}}$ , colored in dark red), PKAc-Ca<sub>2</sub>ATP-Kemptide ( $i_{\text{model}}^{\text{K}_{\text{Ca}}}$ , colored in purple), PKAc-Sr<sub>2</sub>ATP-Kemptide ( $i_{\text{model}}^{\text{K}_{\text{Sr}}}$ , colored in blue), and PKAc-Mg<sub>2</sub>ATP-SP20 ( $i_{\text{model}}^{\text{S}_{\text{Mg}}}$  shown for comparison, colored in black). **(B)** Superposition of the coordination sphere for the M1 site in the initial model structures of PKAc-Ca<sub>2</sub>ATP-SP20 (colored in orange), PKAc-Sr<sub>2</sub>ATP-SP20 (colored in dark red), and PKAc-Mg<sub>2</sub>ATP-SP20 (colored in black).

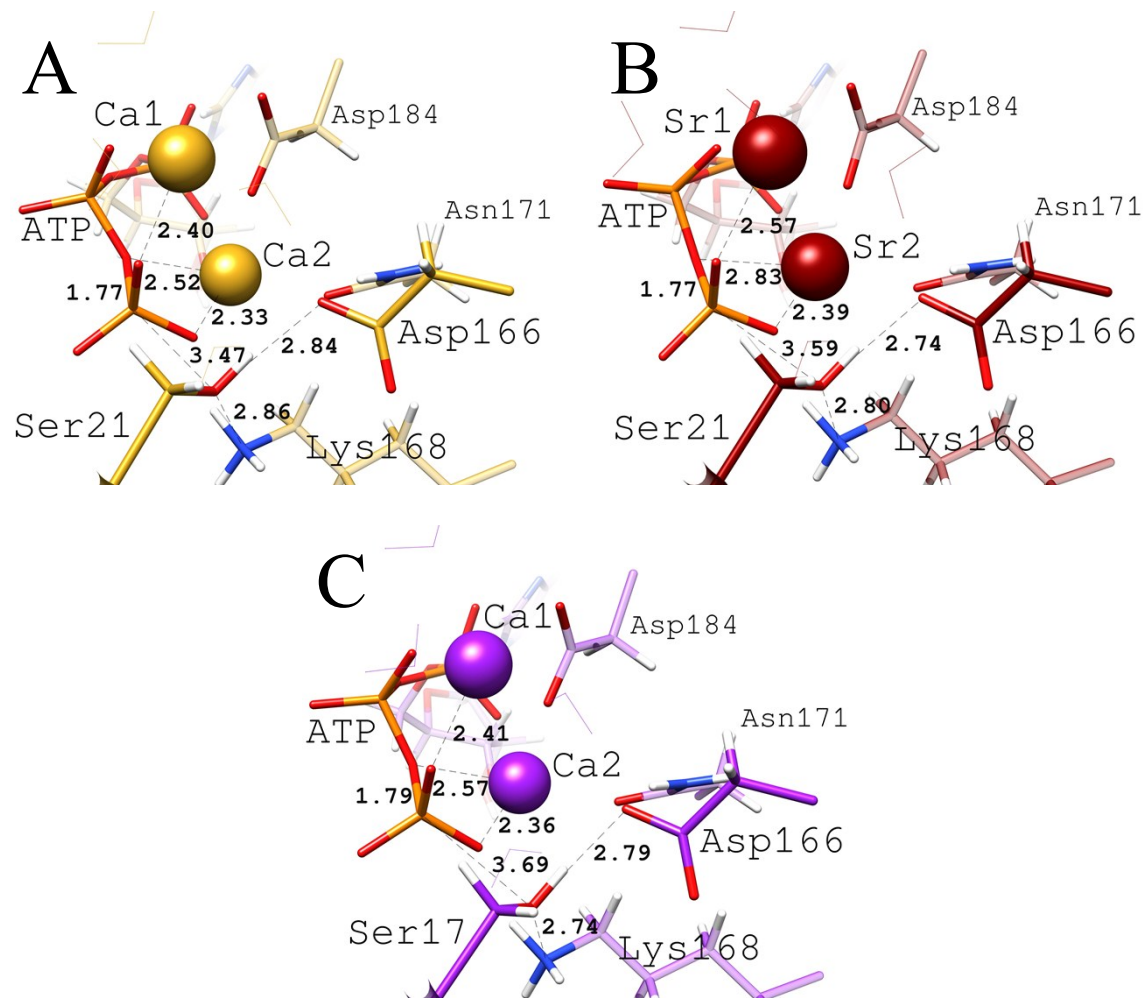

**Figure S2.** Active site structures at: **(A)** QM(B3LYP/6-31+G(d))/CHARMM optimized  $Rd_{Ca/S}$ ; **(B)** QM(B3LYP/def2-TZVP)/CHARMM optimized  $Rd_{Sr/S}$ ; and **(C)** QM(B3LYP/6-31+G(d))/CHARMM optimized  $Rd_{Ca/K}$ . Selected distances are given in Å.

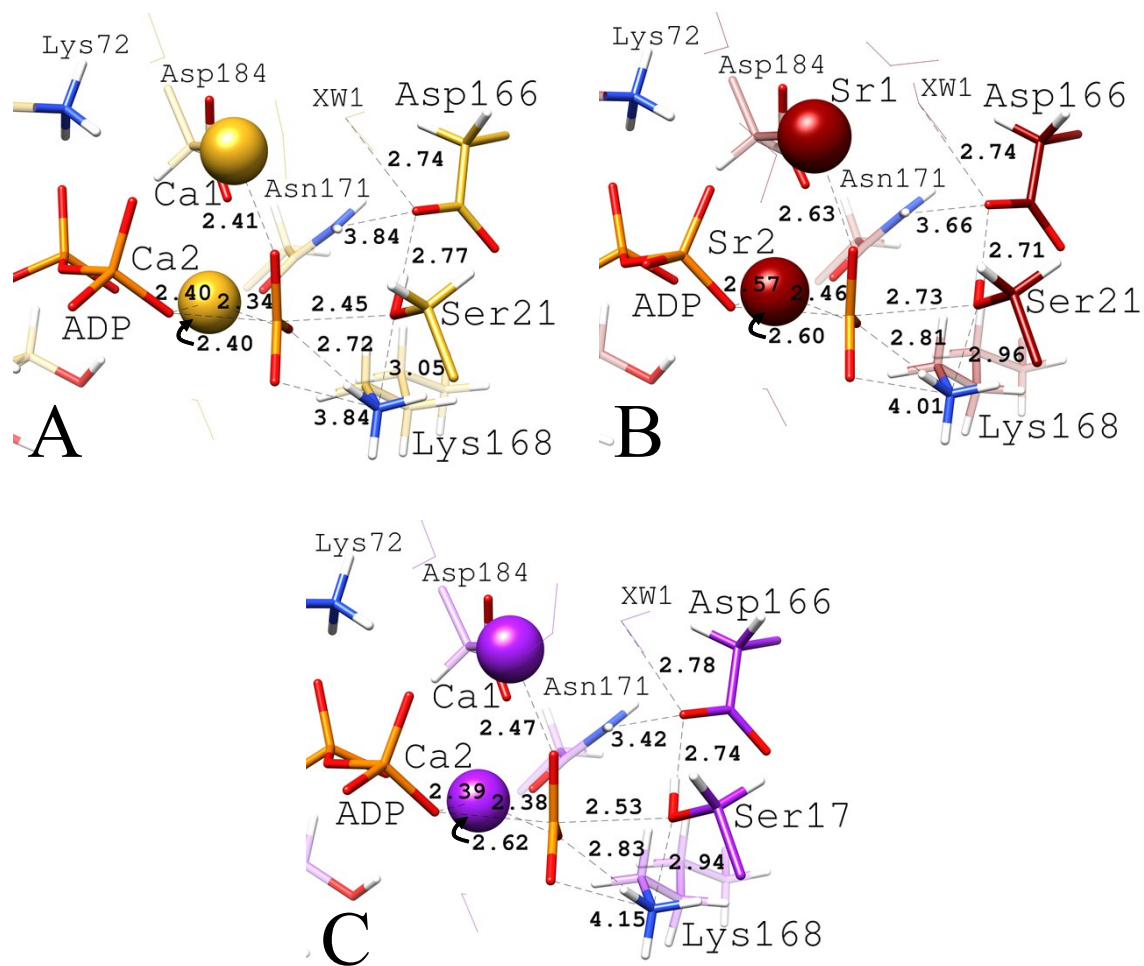

**Figure S3.** Active site structure at: **(A)** QM(B3LYP/6-31+G(d))/CHARMM optimized TSd1P<sub>Ca/S</sub>; **(B)** QM(B3LYP/def2-TZVP)/CHARMM optimized TSd1P<sub>Sr/S</sub>; and **(C)** QM(B3LYP/6-31+G(d))/CHARMM optimized TSd1P<sub>Ca/K</sub>. Selected distances are given in Å.
